# Supplementary material
Source: Springer Nature journal article supplement (https://www.springermedizin.de/resource/supplementary/12968_2010_973_MOESM2_ESM.pdf/9580076)

**A**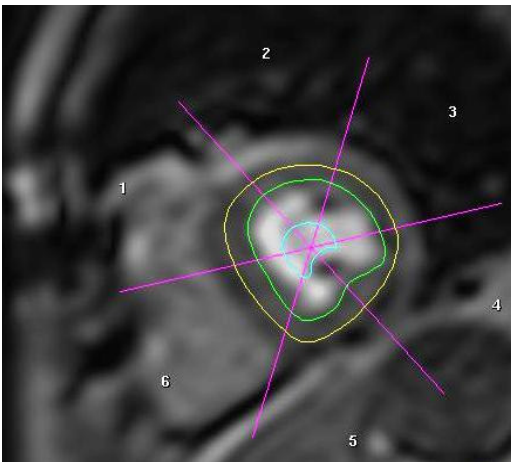**B**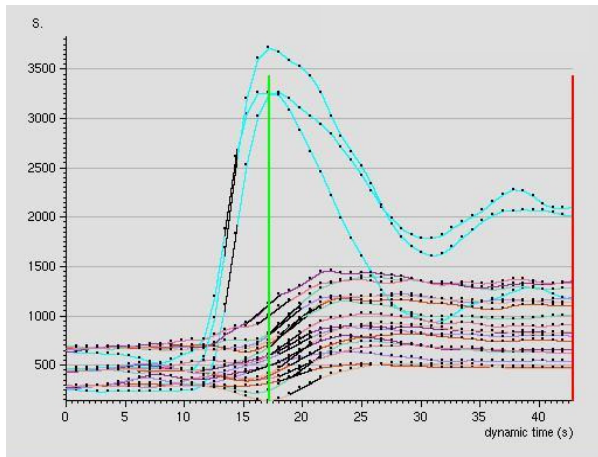

Supplement: MOESM2 [file 9580076]
